# Supplementary material
Source: PubMed Central journal article supplement (PMC9991994)
Supplement: NIHMS1861056-supplement-1.pdf [file NIHMS1861056-supplement-1.pdf]

## Supplemental Figures Legends

**Figure S1. Example of gating of spleen, BM, and Lung PMN neutrophils (CD11b<sup>+</sup>Ly6C<sup>lo</sup>Ly6G<sup>+</sup>) and monocytes (CD11b<sup>+</sup>Ly6C<sup>hi</sup>Ly6G<sup>-</sup>).**

**Figure S2. SNPH deficiency doesn't affect the presence of myeloid cells. (A).** The proportion of PMN and MON in peripheral blood of WT and SNPH-KO mice. N=5. **(B).** PMN were isolated from BM, spleen, or lung of WT and SNPH-KO mice and were cultured for 18 hours in the complete media without cytokines. The proportion of recovered cells from input is shown (n=5). **(C).** Flow cytometric quantification of CD11b<sup>+</sup>Ly6G<sup>+</sup>Ly6C<sup>low</sup> PMN **(C)** and CD11b<sup>+</sup>Ly6G<sup>-</sup>Ly6C<sup>+</sup> MON **(D)** in BM or spleen of WT and SNPH-KO tumor-bearing mice (n=4 per group). Mean and SD are shown. Each symbol represents an individual mouse. N=4 in all experiments. *P* values (not shown due to lack of significance) were calculated in two-sided unpaired Student's t-test.

**Figure S3. SNPH deficiency doesn't affect the presence of T cells. (A)** The absolute number and percentage of CD8<sup>+</sup> T cells in spleen of WT and SNPH-KO mice. **(B)** The absolute number and percentage of CD4<sup>+</sup>FOXP3<sup>+</sup> Tregs in spleen of WT and SNPH-KO mice. **(C)** The absolute number and percentage of CD4<sup>+</sup>Foxp3<sup>-</sup> T cells in spleen of WT and SNPH-KO mice. **(D)** The percentage of proliferating CD8<sup>+</sup> T cells from WT and SNPH-KO mice after stimulation with CD3/CD28 antibodies. **(E)** Geometric MFI of IFN- $\gamma$  staining in CD8<sup>+</sup> T cells from WT and SNPH-KO mice in response to PMA/Ionomycin stimulation. Each symbol represents an individual mouse. N=4 in all experiments. *P* values (not shown due to lack of significance) were calculated in two-sided unpaired Student's t-test.

**Figure S4. Effect of SNPH deficiency on mRNA gene expression in PMN.** (A) Expression heatmap for top genes (FDR < 5%) affected by SNPH deficiency. The list of networks (B) and pathways (C) were determined by Ingenuity Pathway Analysis (IPA) as significantly enriched by SNPH depletion.

**Figure S5. Effect of SNPH deletion of mitochondria.** (A) Mitochondrial mass (Mito Tracker green staining) of BM PMN from WT and SNPH-KO mice. (B-C) Spontaneous and stimulated (fMLP) cytoplasmic ROS level (B) and mitochondrial ROS level (Mitox staining) (C) in BM PMN from WT and SNPH mice. (D) Expression of indicated genes by qPCR in BM PMN from WT and SNPH mice. Each symbol represents an individual mouse. Data are shown as mean  $\pm$  SD. N=3 in all experiments. *P* values (not shown due to lack of significance) were calculated in two-sided unpaired Student's t-test.

**Figure S6. Glucose metabolism in BM PMN from WT and SNPH-KO mice.**

Flow of  $^{13}\text{C}_6$ -glucose metabolism in BM PMN from WT and SNPH-KO mice (n=3 per group). Data are shown as mean  $\pm$  SD. *P* values were calculated in two-sided unpaired Student's t-test.

**Supplemental Video 1.**

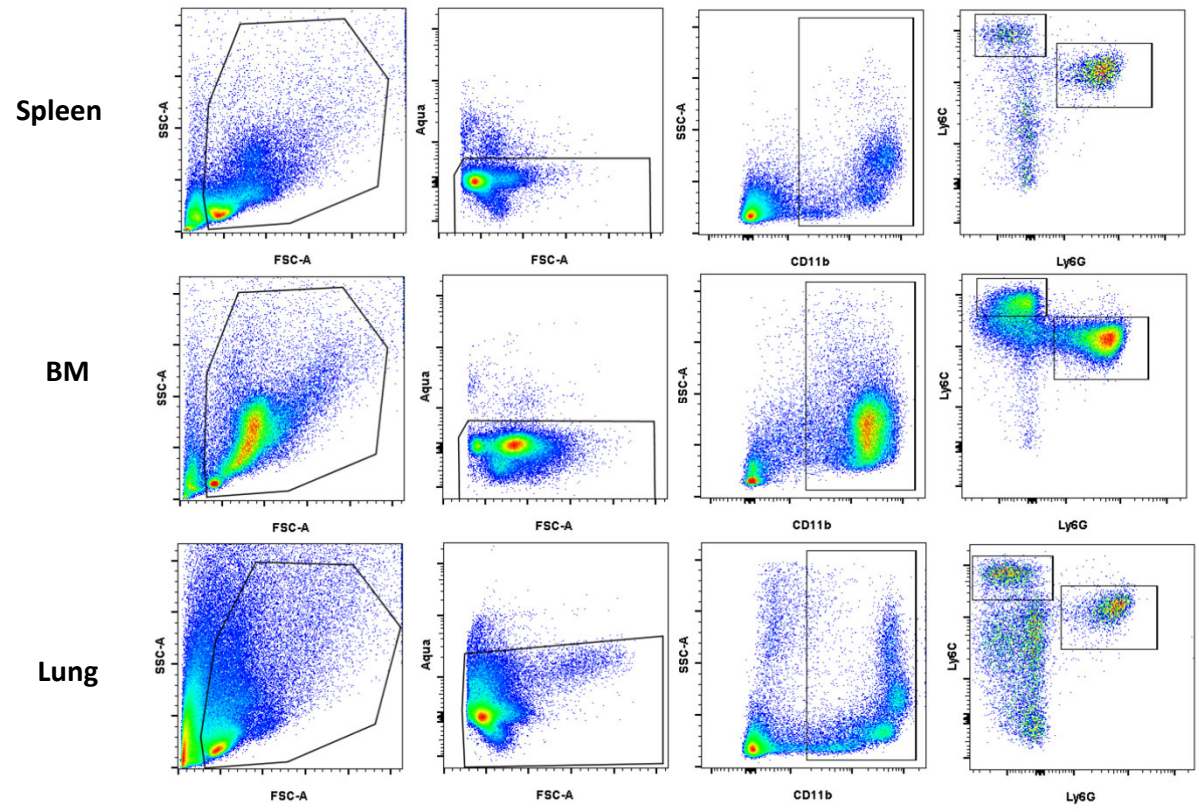

Figure S1

**A**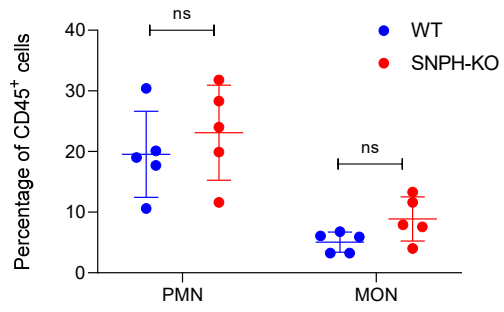**B**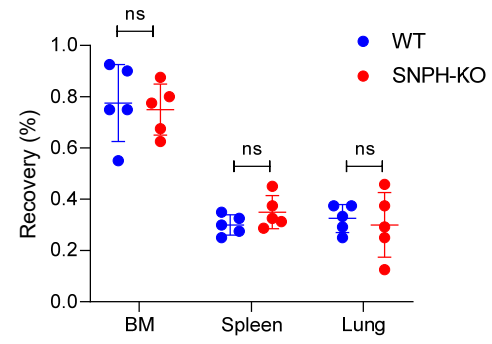**C**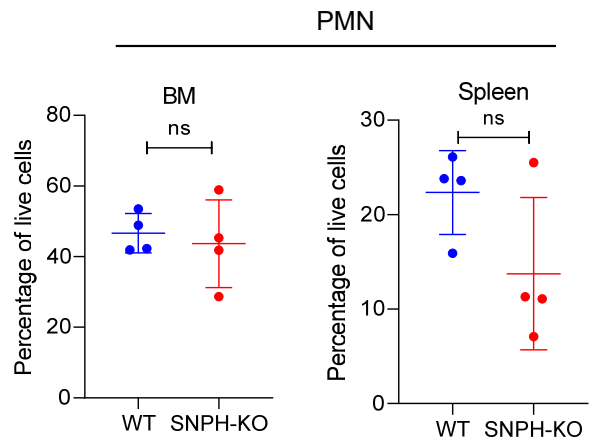**D**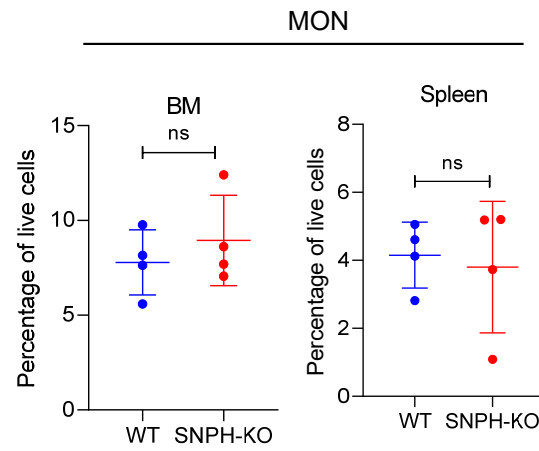**Figure S2**

**A**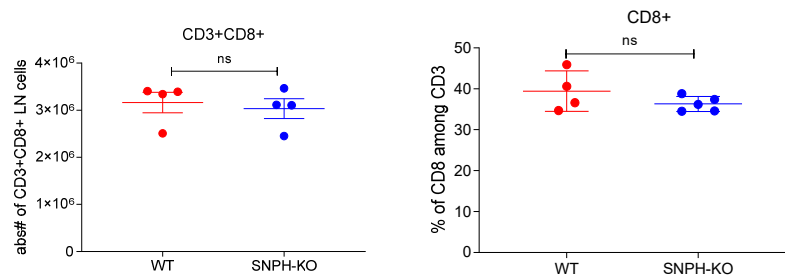**B**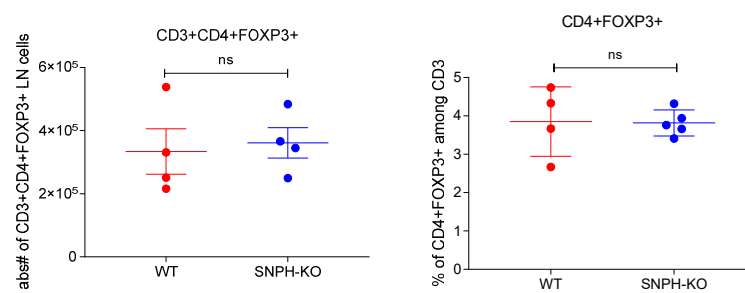**C**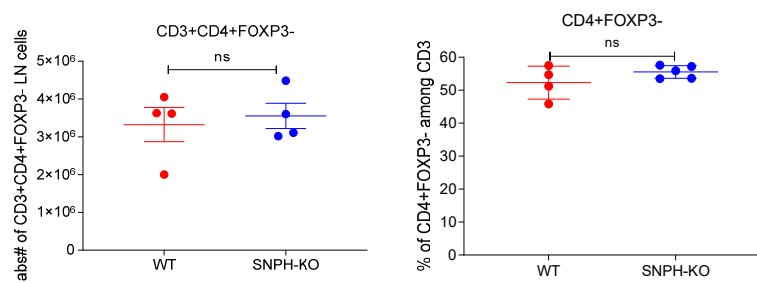**D**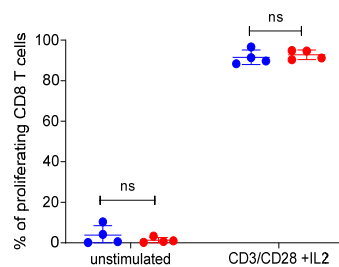**E**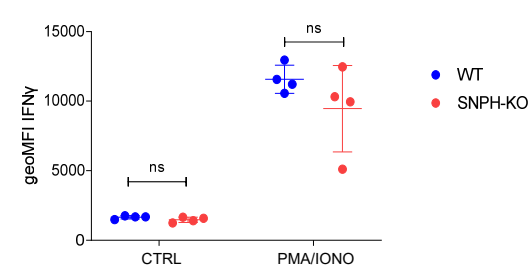**Figure S3**

**A**

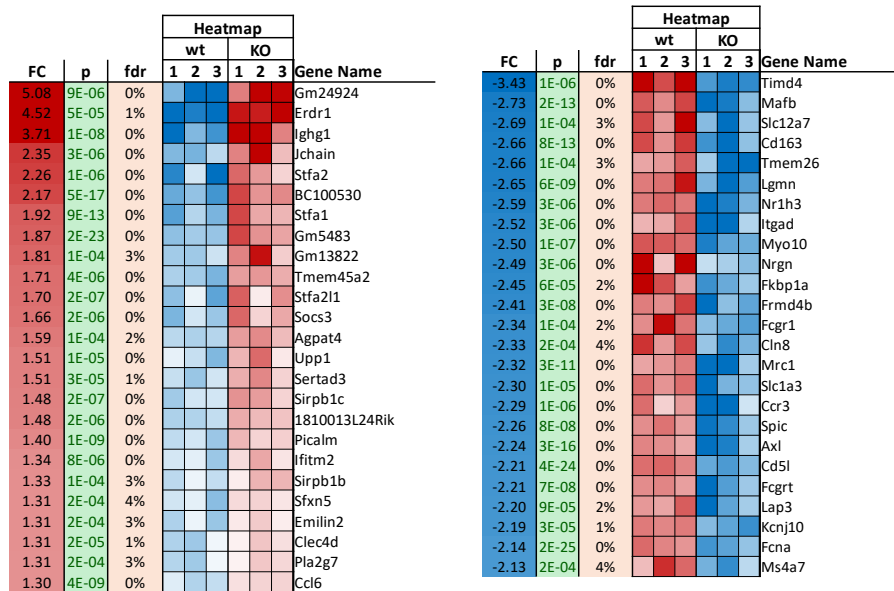

**B**

| Network                                                                                  | Score | N  |
|------------------------------------------------------------------------------------------|-------|----|
| Cellular Assembly and Organization, Cellular Function and Maintenance, Energy Production | 43    | 30 |
| Cellular Function and Maintenance, Free Radical Scavenging, Small Molecule Biochemistry  | 40    | 29 |
| Cell Signaling, Cellular Assembly and Organization, Post-Translational Modification      | 34    | 26 |
| Cellular Function and Maintenance, Molecular Transport, Small Molecule Biochemistry      | 34    | 26 |

**C**

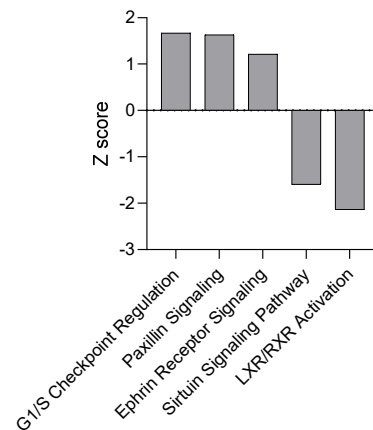

**Figure S4**

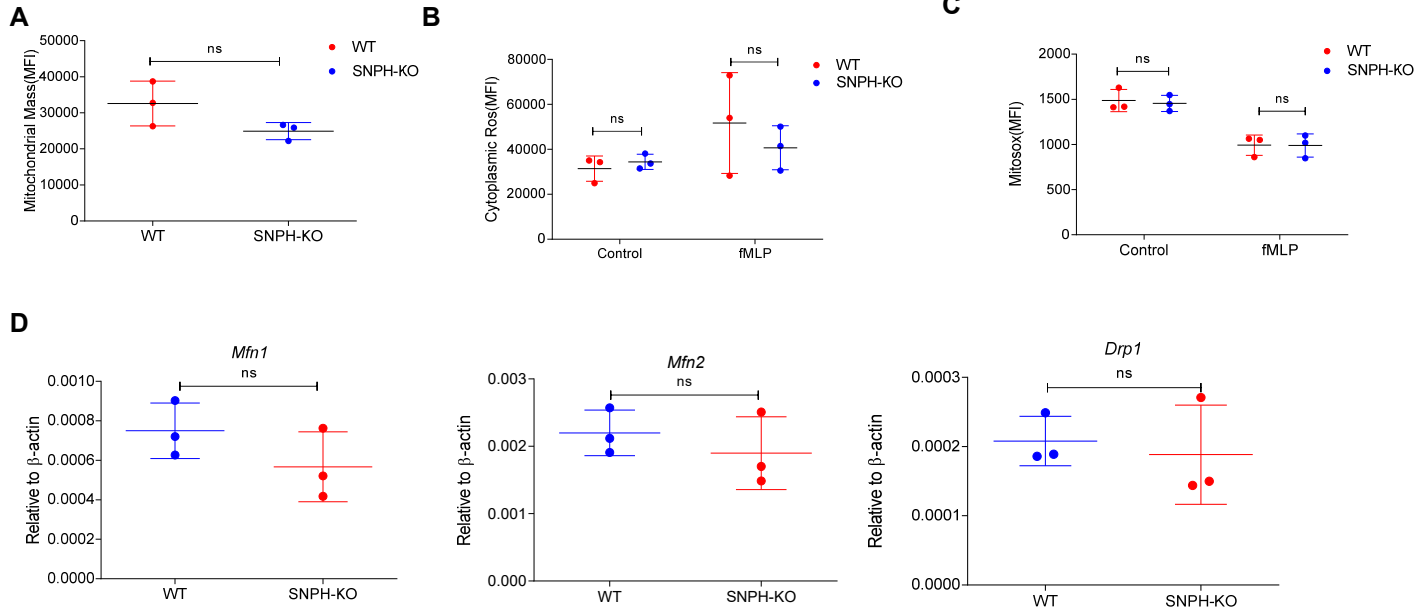

Figure S5

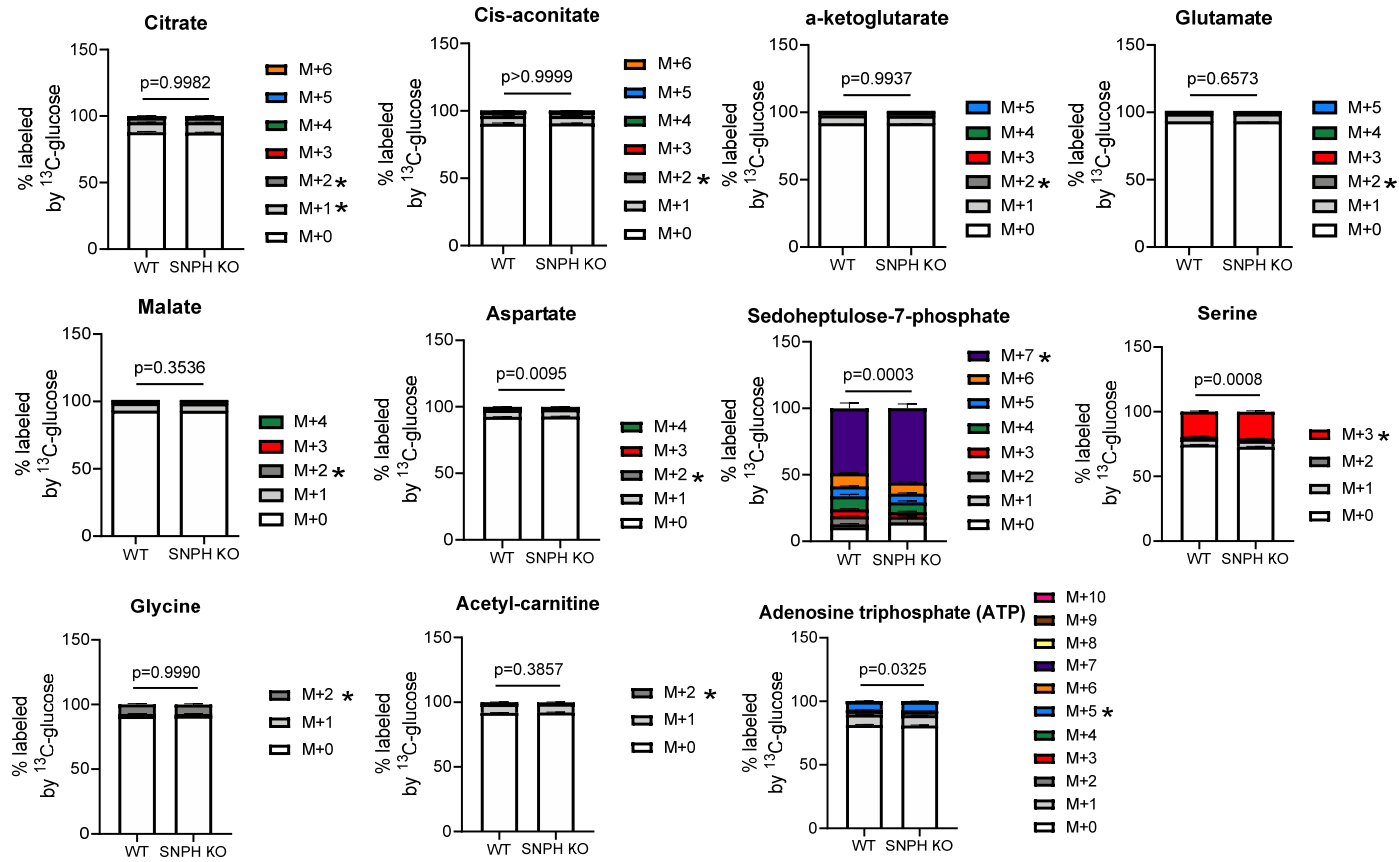

Figure S6



**Supplemental Table 1: List of reagents**

| Company                   | Antibody name                        | Catalog number | Clone         | RRID        |
|---------------------------|--------------------------------------|----------------|---------------|-------------|
| BD Bioscience             | CD45.1 FITC                          | 553775         | A20           | AB_395043   |
|                           | CD45.2 APC-Cy7                       | 560694         | 104           | AB_1727492  |
|                           | Ly6G PE                              | 551461         | 1A8           | AB_394208   |
|                           | CXCR2-FITC                           | 551126         | 6C6           | AB_394060   |
|                           | Cytofix/Cytoperm Solution            | 554722         | N/A           | AB_2869010  |
|                           | Perm/Wash Buffer                     | 323020         | N/A           |             |
| Biolegend                 | CD11b BV421                          | 101236         | M1/70         | AB_11203704 |
| ThermoFisher Scientific   | Phalloidin-AF488                     | A12379         | N/A           |             |
|                           | Aqua Live/Dead Fixable 405           | L34966         |               |             |
|                           | MitoTrackerTM Green FM               | M7514          |               |             |
|                           | MitoSOX                              | M36008         |               |             |
|                           | CM-H2DCFDA                           | C6827          |               |             |
| Cell Signaling Technology | DRP1                                 | 5391           | D8H5          | AB_11178938 |
|                           | P-DRP1 (S616)                        | 4494           | D9A1          | AB_11178659 |
|                           | Myosin Light Chain 2                 | 8505S          | D18E2         | AB_2728760  |
|                           | Phospho-Myosin Light Chain 2 (Ser19) | 3671S          |               | AB_330248   |
| Abcam                     | SDHA                                 | 14715          | 2E3GC12FB2AE2 | AB_301433   |
|                           | SDHB                                 | 14714          | 21A11AE7      | AB_301432   |
|                           | Anti-NDUFB8 antibody                 | ab110242       | 20E9DH10C12   | AB_10859122 |

## Supplemental Table 2: Primers sequence

| Primers (Mouse) | Sequences                 |
|-----------------|---------------------------|
| Snph            | F: CGGTTCAAGTCCTCAAAGACAG |
|                 | R: GCCTCAAGCTCGTCACCTAC   |
| 18s             | F: GGACCAGAGCGAAAGCATTGTC |
|                 | R: TCAATCTCGGGTGGCTGAACGC |
| Mfn1            | F: CCTACTGCTCCTTCTAACCCA  |
|                 | R: AGGGACGCCAATCCTGTGA    |
| Mfn2            | F: AGAACTGGACCCGGTTACCA   |
|                 | R: CACTTCGCTGATACCCCTGA   |
| Drp1            | F: CAGGAATTGTTACGGTTCCTAA |
|                 | R: CCTGAATTAACCTGTCCCGTGA |

| Primers (Human) | Sequences                  |
|-----------------|----------------------------|
| SNPH            | F: CAACTCAGCAGTGGTGGTGACAG |
|                 | R: GCAGCTCCTCCTCCTCTTCC    |
| GAPDH           | F: GAAGGTCGGAGTCAACGGAT    |
|                 | R: TGAAACACCGTCTGGCCC      |
